# Supplementary material for: The Responsiveness of Patients’ Quality of Life to Dental Caries Treatment—A Prospective Study
Source: PLoS One. 2016 Oct 24;11(10):e0164707. doi: 10.1371/journal.pone.0164707 (PMC5077135; doi:10.1371/journal.pone.0164707)
Supplement: S1 File — (XLSX) [file pone.0164707.s001.xlsx]

## Sheet: Sheet1
ID2	impacted	oral1	dper	mper	fper	remain	dmftper	fper_pv	dmftgrp	root	dsper	msper	fsper	fsper_pv	plaqe	maxplaqe	maxperi	peri2	crowd	space	occl	oral2	pdper	pmper	pfper	pdmftper	pfper_pv	untreattgrp	pdsper	pmsper	pfsper	pdmfsper	pfsper_pv	pplaqe	pmaxplaqe	pmaxperi	pperi2	treatt	treats	time	group	quest1	i1	i2	i3	i4	i5	i6	i7
1	0	1	4	0	4	32	8	50	1	0	3	0	5	62.5	1.16667	2	1	0	0	0	2	#NULL!	#NULL!	#NULL!	#NULL!	#NULL!	#NULL!	#NULL!	#NULL!	#NULL!	#NULL!	#NULL!	#NULL!	#NULL!	#NULL!	#NULL!	#NULL!	#NULL!	#NULL!	#NULL!	#NULL!	1	1	0	0	0	1	0	0
10	0	1	5	5	7	27	17	58.3333	2	0	10	25	26	72.2222	0.5	1	1	0	0	0	3	1	0	5	12	17	100	0	0	25	34	59	100	0.166667	1	0	0	5	8	47	3	1	5	5	0	0	0	0	0
100	0	1	2	4	0	28	6	0	1	0	4	20	0	0	0	0	0	0	1	0	3	1	0	4	2	6	100	0	0	20	4	24	100	0	0	0	0	2	4	14	1	1	0	0	0	0	0	0	0
101	0	1	1	4	3	28	8	75	1	0	2	20	3	60	0.666667	1	2	1	0	0	1	1	0	4	4	8	100	0	0	19	6	25	100	0	0	1	0	1	2	14	1	1	1	1	1	1	0	0	1
102	0	1	3	4	3	28	10	50	2	0	4	20	5	55.5556	0.333333	1	1	0	0	0	1	1	0	4	6	10	100	0	0	20	9	29	100	0	0	0	0	3	4	14	3	1	1	0	0	0	0	0	0
103	0	1	8	3	7	29	18	46.6667	2	0	13	15	8	38.0952	2	2	1	0	0	0	2	1	4	3	11	18	73.3333	1	6	15	15	36	71.4286	1	1	1	0	4	7	14	4	1	3	3	2	2	3	2	2
104	0	1	3	0	0	32	3	0	1	0	4	0	0	0	0.333333	1	0	0	0	0	1	1	2	0	1	3	33.3333	1	3	0	1	4	25	0	0	0	0	1	1	14	2	1	0	5	0	0	0	0	0
105	0	1	2	0	7	32	9	77.7778	2	0	2	0	9	81.8182	0.666667	1	1	0	1	1	1	1	1	0	8	9	88.8889	1	1	0	10	11	90.9091	0.5	1	1	0	1	1	13	4	1	0	0	0	0	0	0	0
106	0	1	1	0	6	32	7	85.7143	1	0	3	0	7	70	0	0	0	0	0	0	1	1	0	0	7	7	100	0	0	0	10	10	100	0	0	0	0	1	3	13	1	1	2	2	0	0	0	0	0
107	0	1	4	4	3	28	11	42.8571	2	0	6	20	8	57.1429	0.666667	1	1	0	0	0	1	1	3	4	4	11	57.1429	1	5	20	9	34	64.2857	0.166667	1	1	0	1	1	9	4	1	2	2	0	0	0	0	2
108	0	1	5	4	4	28	13	44.4444	2	0	10	20	8	44.4444	1.33333	2	2	1	0	0	1	1	0	4	9	13	100	0	0	20	18	38	100	0.666667	1	1	0	5	10	9	3	1	2	2	2	0	2	2	2
109	1	1	5	3	0	29	8	0	1	0	10	15	0	0	1.16667	2	2	1	0	0	1	1	3	3	2	8	40	1	8	15	2	25	20	0.666667	1	1	0	2	2	14	2	1	1	1	0	0	1	1	1
11	0	1	3	0	1	32	4	25	1	0	4	0	1	20	0	0	0	0	0	0	1	1	0	0	4	4	100	0	0	0	5	5	100	0	0	0	0	3	4	14	1	1	0	0	0	0	0	0	0
110	1	1	5	1	5	31	11	50	2	0	10	4	16	61.5385	0.333333	1	0	0	0	0	1	1	2	1	8	11	80	1	6	5	20	31	76.9231	0	0	0	0	3	4	9	4	1	0	0	0	0	0	0	0
111	0	1	2	2	0	30	4	0	1	0	4	10	0	0	1.66667	2	2	1	0	0	1	1	1	2	1	4	50	1	3	10	1	14	25	1.83333	2	2	0	1	1	14	2	1	2	0	0	0	3	0	1
112	0	1	2	0	4	32	6	66.6667	1	0	5	0	6	54.5455	0.333333	1	1	0	0	0	1	1	0	0	6	6	100	0	0	0	10	10	100	0	0	1	0	2	5	12	1	1	2	2	0	0	0	0	2
113	0	1	5	6	5	26	16	50	2	0	7	30	17	70.8333	0.333333	1	0	0	1	0	2	1	3	6	7	16	70	1	5	30	21	56	80.7692	0.5	1	1	0	2	2	15	4	1	2	2	1	1	1	1	2
114	0	1	1	4	1	28	6	50	1	0	1	20	2	66.6667	0	0	0	0	0	0	1	1	0	4	2	6	100	0	0	20	3	23	100	0	0	0	0	1	1	10	1	1	0	0	0	0	0	0	0
115	0	1	1	0	3	32	4	75	1	0	2	0	4	66.6667	0	0	1	0	0	0	1	1	0	0	4	4	100	0	0	0	6	6	100	0	0	1	0	1	2	14	1	1	0	0	0	0	0	0	0
116	0	1	2	2	6	30	10	75	2	0	3	10	7	70	0	0	1	0	0	0	1	1	1	2	7	10	87.5	1	1	10	9	20	90	0.5	1	1	0	1	2	14	4	1	5	5	1	0	3	0	3
117	0	1	7	4	3	28	14	30	2	2	15	20	9	37.5	0	0	1	0	0	0	1	1	3	4	7	14	70	1	5	20	19	44	79.1667	0	0	0	0	4	10	9	4	1	3	0	5	0	5	0	5
118	0	1	2	3	6	29	11	75	2	0	4	15	9	69.2308	0	0	0	0	1	0	1	1	0	3	8	11	100	0	0	15	13	28	100	0	0	0	0	2	4	14	3	1	2	0	0	0	0	0	2
119	0	1	5	4	4	28	13	44.4444	2	0	9	20	7	43.75	1.5	2	2	1	1	0	3	1	2	4	7	13	77.7778	1	4	20	12	36	75	0.666667	1	1	0	3	5	14	4	1	0	0	0	0	0	0	0
12	0	1	5	0	3	32	8	37.5	1	0	4	0	5	55.5556	0.166667	1	1	0	0	0	3	1	0	0	7	7	100	0	0	0	8	8	100	0	0	0	0	5	4	14	1	1	2	0	0	0	0	0	3
120	0	1	2	4	1	28	7	33.3333	1	0	6	20	2	25	0	0	0	0	1	0	1	1	1	4	2	7	66.6667	1	3	20	5	28	62.5	0	0	0	0	1	3	29	2	1	0	0	0	0	0	0	1
121	0	1	4	1	1	31	6	20	1	0	10	5	2	16.6667	0	0	0	0	1	0	1	1	3	1	2	6	40	1	7	5	5	17	41.6667	0	0	0	0	1	3	17	2	1	3	4	0	4	2	0	0
122	0	1	14	8	4	24	26	22.2222	2	5	25	40	5	16.6667	2.66667	3	2	1	0	0	1	1	11	8	7	26	38.8889	1	22	40	9	71	29.0323	1	1	1	0	3	3	21	4	1	5	2	0	0	3	2	5
123	0	1	2	0	4	32	6	66.6667	1	0	5	0	9	64.2857	0.666667	1	1	0	0	0	3	1	0	0	6	6	100	0	0	0	14	14	100	0	0	0	0	2	5	14	1	1	4	3	3	3	2	2	4
124	0	1	4	0	2	32	6	33.3333	1	0	5	0	3	37.5	1.16667	2	1	0	0	0	1	1	1	0	5	6	83.3333	1	1	0	7	8	87.5	0.333333	1	1	0	3	3	14	2	1	4	4	4	3	3	3	2
125	0	1	2	4	3	28	9	60	2	0	2	20	8	80	0	0	0	0	0	0	2	1	0	4	5	9	100	0	0	20	10	30	100	0	0	0	0	2	2	14	3	1	3	3	2	2	3	3	3
126	0	1	2	0	2	32	4	50	1	0	5	0	6	54.5455	0.666667	1	1	0	0	0	1	1	0	0	4	4	100	0	0	0	11	11	100	0	0	1	0	2	5	13	1	1	4	4	4	4	4	3	4
127	0	1	3	0	3	32	6	50	1	0	5	0	8	61.5385	0.666667	1	1	0	0	0	3	1	0	0	6	6	100	0	0	0	13	13	100	0	0	1	0	3	5	12	1	1	4	3	4	3	2	2	4
128	0	1	2	4	1	28	7	33.3333	1	0	3	20	2	40	1	1	1	0	1	1	1	1	0	4	3	7	100	0	0	20	5	25	100	0.5	1	1	0	2	3	14	1	1	2	1	1	0	0	0	1
129	0	1	2	0	0	32	2	0	1	0	3	0	0	0	0	0	0	0	0	0	1	1	0	0	2	2	100	0	0	0	3	3	100	0	0	0	0	2	3	13	1	1	3	3	1	1	1	1	1
13	0	1	3	0	11	32	14	78.5714	2	0	5	0	31	86.1111	0.833333	1	1	0	0	0	1	#NULL!	#NULL!	#NULL!	#NULL!	#NULL!	#NULL!	#NULL!	#NULL!	#NULL!	#NULL!	#NULL!	#NULL!	#NULL!	#NULL!	#NULL!	#NULL!	#NULL!	#NULL!	#NULL!	#NULL!	1	2	2	0	1	1	1	2
130	0	1	3	4	5	28	12	62.5	2	0	6	20	18	75	1.33333	2	2	1	1	0	1	1	0	4	8	12	100	0	0	20	24	44	100	0.5	1	1	0	3	6	15	3	1	3	3	1	2	1	1	1
131	0	1	2	4	4	28	10	66.6667	2	0	4	20	9	69.2308	1	1	1	0	0	0	2	1	0	4	6	10	100	0	0	20	13	33	100	0	0	1	0	2	4	14	3	1	2	2	2	1	1	1	1
132	0	1	6	3	5	29	14	45.4545	2	0	15	15	9	37.5	1	1	1	0	0	0	1	1	4	3	7	14	63.6364	1	8	15	16	39	66.6667	0	0	1	0	2	7	13	4	1	0	0	0	0	0	0	2
133	0	1	4	3	10	29	17	71.4286	2	0	6	15	12	66.6667	1	1	1	0	1	0	2	1	3	3	11	17	78.5714	1	5	15	15	35	75	1	1	1	0	1	1	9	4	1	2	0	0	0	0	0	0
134	0	1	1	6	8	26	15	88.8889	2	0	1	30	21	95.4545	1	1	1	0	0	0	1	#NULL!	#NULL!	#NULL!	#NULL!	#NULL!	#NULL!	#NULL!	#NULL!	#NULL!	#NULL!	#NULL!	#NULL!	#NULL!	#NULL!	#NULL!	#NULL!	#NULL!	#NULL!	#NULL!	#NULL!	1	4	5	1	0	1	1	4
135	1	1	1	2	8	30	11	88.8889	2	0	1	10	7	87.5	0	0	0	0	0	0	1	#NULL!	#NULL!	#NULL!	#NULL!	#NULL!	#NULL!	#NULL!	#NULL!	#NULL!	#NULL!	#NULL!	#NULL!	#NULL!	#NULL!	#NULL!	#NULL!	#NULL!	#NULL!	#NULL!	#NULL!	1	0	0	0	0	0	0	0
14	0	1	4	0	8	32	12	66.6667	2	0	6	0	14	70	1.83333	3	2	1	0	0	1	1	0	0	12	12	100	0	0	0	21	21	100	1.33333	2	1	0	4	4	14	3	1	4	0	0	0	5	0	2
15	0	1	4	0	6	32	10	60	2	0	5	0	13	72.2222	0	0	0	0	0	0	2	1	0	0	10	10	100	0	0	0	19	19	100	0	0	0	0	4	5	54	3	1	0	0	0	0	0	0	0
16	0	1	5	2	4	30	11	44.4444	2	0	10	10	14	58.3333	0.666667	2	2	1	0	0	1	1	3	2	6	11	66.6667	1	4	10	19	33	82.6087	0.333333	1	1	0	2	5	7	4	1	3	4	0	0	2	0	2
17	1	1	5	3	8	29	16	61.5385	2	0	10	15	13	56.5217	0.666667	1	1	0	0	0	1	1	1	3	12	16	92.3077	1	1	15	23	39	95.8333	0.333333	1	1	0	4	9	14	4	1	4	0	0	0	0	0	1
18	0	1	16	5	3	27	24	15.7895	2	0	22	25	3	12	1.33333	2	2	1	0	0	1	1	11	5	8	24	42.1053	1	17	25	12	54	41.3793	1	2	1	0	5	8	15	4	1	5	3	0	0	1	0	1
19	0	1	4	2	2	30	8	33.3333	1	1	6	10	2	25	0.333333	1	1	0	0	0	3	1	1	2	5	8	83.3333	1	1	10	7	18	87.5	0	0	0	0	3	5	14	2	1	1	0	0	2	2	1	1
2	0	1	11	7	0	25	18	0	2	3	17	35	0	0	0.333333	1	1	0	0	1	3	1	5	7	6	18	54.5455	1	11	35	6	52	35.2941	0.333333	1	1	0	6	6	39	4	1	5	5	5	2	2	5	5
20	0	1	3	2	4	30	9	57.1429	2	0	6	10	11	64.7059	0	0	0	0	1	0	1	1	0	2	7	9	100	0	0	10	17	27	100	0	0	0	0	3	6	8	3	1	0	0	0	0	0	0	0
21	0	1	5	4	0	28	9	0	2	0	11	20	0	0	0	0	2	1	0	0	3	1	0	4	5	9	100	0	0	20	11	31	100	0	0	0	0	5	11	9	3	1	3	5	0	0	0	0	0
22	1	1	2	3	5	29	10	71.4286	2	0	6	15	15	71.4286	0	0	0	0	1	0	1	1	0	3	7	10	100	0	0	15	21	36	100	0	0	0	0	2	6	7	3	1	0	1	0	0	0	0	1
23	1	1	3	5	4	27	12	57.1429	2	2	4	15	4	50	0.833333	3	2	1	1	0	2	1	2	6	5	13	71.4286	1	2	30	6	38	75	0.5	2	2	0	1	2	70	4	1	1	2	2	2	2	2	2
24	1	1	8	5	3	27	16	27.2727	2	5	13	25	3	18.75	1.66667	2	1	0	1	0	1	1	5	5	6	16	54.5455	1	7	25	9	41	56.25	1	1	1	0	3	6	62	4	1	2	0	0	2	2	2	2
25	1	1	3	2	7	30	12	70	2	0	5	10	15	75	0	0	0	0	1	0	1	1	0	2	10	12	100	0	0	10	19	29	100	0	0	0	0	3	4	16	3	1	0	0	0	0	0	2	2
26	0	1	6	0	2	32	8	25	1	0	8	0	5	38.4615	0.666667	1	2	1	0	0	3	1	2	0	6	8	75	1	2	0	11	13	84.6154	1.5	2	2	0	4	6	14	2	1	4	3	2	0	0	0	3
27	0	1	1	0	1	32	2	50	1	0	3	0	2	40	0.333333	1	1	0	0	1	3	1	0	0	2	2	100	0	0	0	5	5	100	0	0	0	0	1	3	7	1	1	0	0	0	0	0	0	0
28	0	1	2	5	4	27	11	66.6667	2	0	2	25	5	71.4286	0	0	0	0	0	1	3	1	0	5	6	11	100	0	0	25	8	33	100	0	0	0	0	2	2	21	3	1	3	4	3	3	4	2	2
29	0	1	5	3	1	29	9	16.6667	2	0	11	15	2	15.3846	0.166667	1	1	0	0	0	1	1	2	3	4	9	66.6667	1	4	15	9	28	69.2308	0.333333	1	1	0	3	7	20	4	1	2	0	0	0	0	0	2
3	0	1	1	4	12	28	17	92.3077	2	0	3	20	48	94.1176	0	0	0	0	0	0	1	1	0	4	13	17	100	0	0	20	51	71	100	0	0	0	0	1	3	26	3	1	5	0	0	0	0	0	2
30	0	1	4	4	5	28	13	55.5556	2	0	6	20	24	80	0	0	0	0	0	0	3	1	2	4	7	13	77.7778	1	3	20	27	50	90	0	0	0	0	2	3	15	4	1	2	2	0	0	0	0	2
31	0	1	2	0	0	32	2	0	1	0	3	0	0	0	0	0	0	0	1	0	1	1	0	0	2	2	100	0	0	0	3	3	100	0	0	0	0	2	2	85	1	1	0	0	0	0	0	0	0
32	0	1	3	0	0	32	3	0	1	0	3	0	0	0	0.166667	1	1	0	0	0	3	1	2	0	1	3	33.3333	1	2	0	1	3	33.3333	0	0	0	0	1	1	140	2	1	0	0	0	0	0	0	0
33	1	1	3	2	5	30	10	62.5	2	0	3	9	8	72.7273	0	0	0	0	1	0	1	#NULL!	#NULL!	#NULL!	#NULL!	#NULL!	#NULL!	#NULL!	#NULL!	#NULL!	#NULL!	#NULL!	#NULL!	#NULL!	#NULL!	#NULL!	#NULL!	#NULL!	#NULL!	#NULL!	#NULL!	1	0	0	0	0	0	0	0
34	0	1	3	4	1	28	8	25	1	0	4	20	1	20	0.333333	1	2	1	1	0	1	1	0	4	4	8	100	0	0	20	6	26	100	1.33333	2	2	0	3	4	14	1	1	2	0	0	0	0	0	0
35	0	1	1	4	8	28	13	88.8889	2	0	1	20	9	90	0	0	0	0	0	0	1	1	0	4	9	13	100	0	0	20	7	27	100	0	0	0	0	1	0	21	3	1	0	4	0	0	0	0	0
36	1	1	1	3	5	29	9	83.3333	2	0	1	15	13	92.8571	0.666667	1	1	0	0	0	2	1	0	3	6	9	100	0	0	15	14	29	100	0.666667	1	1	0	1	1	9	3	1	1	3	0	0	0	3	1
37	0	1	2	4	1	28	7	33.3333	1	0	3	20	2	40	0	0	0	0	0	1	1	1	1	4	2	7	66.6667	1	2	20	3	25	60	0	0	1	0	1	1	121	2	1	1	2	0	0	0	0	0
38	1	1	5	1	0	31	6	0	1	0	9	5	0	0	0.666667	1	1	0	0	1	2	1	2	1	3	6	60	1	4	5	5	14	55.5556	0.166667	1	1	0	3	5	8	2	1	5	4	0	2	4	0	5
39	0	1	1	3	7	29	11	87.5	2	0	2	15	9	81.8182	1	1	1	0	0	0	2	1	0	3	8	11	100	0	0	15	12	27	100	0.333333	1	1	0	1	2	15	3	1	1	1	1	1	1	1	1
4	0	1	1	4	8	28	13	88.8889	2	0	2	20	18	90	0	0	0	0	0	0	1	1	0	4	9	13	100	0	0	20	20	40	100	0	0	0	0	1	2	36	3	1	4	5	0	2	4	2	2
40	0	1	2	3	9	29	14	81.8182	2	0	5	15	27	84.375	0.5	2	1	0	0	0	1	1	0	3	11	14	100	0	0	15	30	45	100	0	0	1	0	2	4	14	3	1	2	0	0	0	0	0	0
41	0	1	1	0	0	32	1	0	1	0	2	0	0	0	0	0	0	0	1	0	3	1	0	0	1	1	100	0	0	0	2	2	100	0	0	0	0	1	2	15	1	1	2	2	2	2	2	2	2
42	1	1	3	5	13	27	21	81.25	2	0	5	25	40	88.8889	2.33333	3	2	1	0	0	2	1	0	5	16	21	100	0	0	25	45	70	100	0.666667	1	1	0	3	5	12	3	1	2	2	0	0	0	0	2
43	0	1	3	2	0	30	5	0	1	0	3	10	0	0	0.833333	1	2	1	0	0	2	1	0	2	3	5	100	0	0	10	3	13	100	0	0	1	0	3	3	8	1	1	0	2	0	0	0	0	0
44	0	1	1	4	6	28	11	85.7143	2	0	3	20	14	82.3529	1	1	2	1	0	0	1	1	0	4	7	11	100	0	0	20	17	37	100	0.666667	1	1	0	1	3	120	3	1	1	0	0	0	0	0	1
45	0	1	9	5	1	27	15	10	2	1	15	25	1	6.25	1	1	1	0	0	0	1	1	4	5	6	15	60	1	7	25	9	41	56.25	0.333333	1	1	0	5	8	73	4	1	2	2	0	0	0	0	0
46	0	1	3	1	1	31	5	25	1	0	5	5	1	16.6667	0.333333	1	1	0	0	0	1	1	0	1	4	5	100	0	0	5	6	11	100	0	0	0	0	3	5	14	1	1	0	0	0	0	0	0	0
47	0	1	3	9	13	23	25	81.25	2	1	4	45	47	92.1569	0	0	0	0	0	0	1	1	0	9	16	25	100	0	0	45	51	96	100	0	0	0	0	3	4	14	3	1	1	1	1	1	1	4	1
48	0	1	2	5	7	27	14	77.7778	2	0	2	24	20	90.9091	1.33333	2	2	1	0	0	2	1	0	5	9	14	100	0	0	25	22	47	100	0.666667	1	1	0	2	2	13	3	1	0	3	5	0	0	0	5
49	1	1	1	1	6	31	8	85.7143	1	1	3	5	11	78.5714	0.833333	1	2	1	0	0	1	1	0	1	7	8	100	0	0	5	14	19	100	0.333333	1	1	0	1	3	17	1	1	3	0	0	0	0	0	1
5	0	1	2	0	0	32	2	0	1	0	3	0	0	0	1.16667	2	1	0	0	0	1	#NULL!	#NULL!	#NULL!	#NULL!	#NULL!	#NULL!	#NULL!	#NULL!	#NULL!	#NULL!	#NULL!	#NULL!	#NULL!	#NULL!	#NULL!	#NULL!	#NULL!	#NULL!	#NULL!	#NULL!	1	2	0	0	0	0	0	0
50	0	1	9	4	0	28	13	0	2	0	14	20	1	6.66667	0.666667	1	1	0	0	0	3	1	4	4	5	13	55.5556	1	8	20	7	35	46.6667	0.5	1	1	0	5	6	14	4	1	2	2	0	0	0	0	1
51	0	1	1	5	12	27	18	92.3077	2	0	2	25	34	94.4444	1	1	1	0	0	0	2	1	0	5	13	18	100	0	0	25	36	61	100	0.333333	1	1	0	1	2	14	3	1	0	0	0	0	0	0	0
52	0	1	3	2	1	30	6	25	1	0	3	10	1	25	0	0	0	0	1	0	2	1	0	2	4	6	100	0	0	9	4	13	100	0	0	0	0	3	3	14	1	1	0	0	0	0	0	0	0
53	0	1	4	5	5	27	14	55.5556	2	1	5	25	11	68.75	1.66667	2	2	1	1	0	3	1	0	5	9	14	100	0	0	25	17	42	100	1.33333	2	2	0	4	5	14	3	1	2	2	0	0	0	1	1
54	1	1	6	2	3	30	11	33.3333	2	0	11	10	2	15.3846	0	0	0	0	0	0	2	1	3	3	5	11	62.5	1	5	15	8	28	61.5385	0.833333	2	2	0	2	5	14	4	1	0	0	2	0	0	4	2
55	0	1	4	2	0	30	6	0	1	0	5	10	0	0	1.83333	3	2	1	0	0	2	1	0	2	4	6	100	0	0	10	5	15	100	1.16667	2	2	0	4	5	14	1	1	0	0	0	0	0	0	0
56	0	1	5	4	12	28	21	70.5882	2	0	6	20	26	81.25	0.833333	1	1	0	1	0	3	1	2	4	15	21	88.2353	1	1	20	31	52	96.875	1.33333	2	1	0	3	5	16	4	1	0	0	0	0	0	5	5
57	0	1	3	3	4	29	10	57.1429	2	0	5	15	8	61.5385	1.16667	2	2	1	0	0	1	1	0	3	7	10	100	0	0	15	13	28	100	0.5	1	1	0	3	5	10	3	1	0	0	0	0	2	2	4
58	0	1	2	4	2	28	8	50	1	0	2	20	5	71.4286	0.333333	1	1	0	1	0	1	1	0	4	4	8	100	0	0	20	7	27	100	0	0	0	0	2	2	9	1	1	2	5	0	0	0	0	2
59	0	1	3	7	9	25	19	75	2	0	5	35	19	79.1667	0.5	1	1	0	0	0	1	#NULL!	#NULL!	#NULL!	#NULL!	#NULL!	#NULL!	#NULL!	#NULL!	#NULL!	#NULL!	#NULL!	#NULL!	#NULL!	#NULL!	#NULL!	#NULL!	#NULL!	#NULL!	#NULL!	#NULL!	1	3	1	1	0	1	2	4
6	0	1	3	0	10	32	13	76.9231	2	0	3	0	36	92.3077	2.5	3	2	1	0	0	1	1	0	0	14	14	100	0	0	0	40	40	100	1.83333	2	1	0	3	3	15	3	1	0	2	3	2	2	4	4
60	0	1	4	7	5	25	16	55.5556	2	0	7	35	12	63.1579	0	0	0	0	0	0	1	1	0	7	9	16	100	0	0	35	19	54	100	0	0	0	0	4	7	14	3	1	0	4	0	0	0	0	2
61	0	1	3	4	0	28	7	0	1	0	8	20	0	0	0	0	0	0	0	0	1	1	0	4	3	7	100	0	0	20	8	28	100	0.166667	1	1	0	3	8	12	1	1	0	2	2	0	0	4	4
62	0	1	1	1	1	31	3	50	1	0	1	5	2	66.6667	0.666667	1	1	0	1	0	1	1	0	1	2	3	100	0	0	5	3	8	100	0	0	1	0	1	1	42	1	1	4	0	0	0	0	0	2
63	0	1	3	4	10	28	17	76.9231	2	0	4	20	32	88.8889	0	0	0	0	0	0	1	1	0	4	13	17	100	0	0	20	35	55	100	0	0	0	0	3	4	18	3	1	2	2	2	2	2	2	2
64	0	1	1	2	11	30	14	91.6667	2	0	2	10	17	89.4737	0	0	0	0	0	0	1	1	0	2	12	14	100	0	0	10	19	29	100	0	0	0	0	1	2	21	3	1	2	2	0	0	0	0	0
65	0	1	3	3	8	29	14	72.7273	2	0	5	15	30	85.7143	0	0	0	0	1	0	2	1	2	3	9	14	81.8182	1	3	15	34	52	91.8919	0	0	0	0	1	2	14	4	1	1	0	0	0	1	1	1
66	0	1	7	4	2	28	13	22.2222	2	0	16	20	6	27.2727	0.333333	1	1	0	0	0	1	#NULL!	#NULL!	#NULL!	#NULL!	#NULL!	#NULL!	#NULL!	#NULL!	#NULL!	#NULL!	#NULL!	#NULL!	#NULL!	#NULL!	#NULL!	#NULL!	#NULL!	#NULL!	#NULL!	#NULL!	1	2	0	0	0	0	0	2
67	0	1	4	7	13	25	24	76.4706	2	0	7	60	22	75.8621	1	1	1	0	0	0	2	1	0	7	17	24	100	0	0	60	28	88	100	0.333333	1	1	0	4	7	14	3	1	2	0	0	1	1	1	1
68	0	1	8	1	0	31	9	0	2	0	18	5	0	0	2.16667	3	2	1	1	0	2	1	5	1	3	9	37.5	1	10	5	8	23	44.4444	1	1	1	0	3	8	14	4	1	3	2	0	0	0	0	0
69	0	1	1	7	9	25	17	90	2	0	2	35	22	91.6667	0.666667	1	2	1	0	0	2	1	0	7	10	17	100	0	0	35	24	59	100	0.166667	1	1	0	1	2	21	3	1	5	5	3	0	3	3	3
7	1	1	7	0	8	32	15	53.3333	2	0	8	0	12	60	1.33333	2	2	1	0	0	1	#NULL!	#NULL!	#NULL!	#NULL!	#NULL!	#NULL!	#NULL!	#NULL!	#NULL!	#NULL!	#NULL!	#NULL!	#NULL!	#NULL!	#NULL!	#NULL!	#NULL!	#NULL!	#NULL!	#NULL!	1	0	0	0	0	0	0	0
70	0	1	3	0	0	32	3	0	1	0	6	0	0	0	0	0	0	0	0	0	1	1	1	0	2	3	66.6667	1	2	0	4	6	66.6667	0	0	0	0	2	4	7	2	1	3	4	0	0	0	0	0
71	1	1	7	4	2	28	13	22.2222	2	1	17	20	5	22.7273	0.166667	1	1	0	0	0	1	1	0	4	9	13	100	0	0	20	22	42	100	0.166667	1	1	0	7	17	9	3	1	5	4	2	5	2	2	1
72	0	1	2	4	2	28	8	50	1	0	2	20	4	66.6667	0	0	0	0	0	0	1	1	0	4	4	8	100	0	0	20	6	26	100	0	0	0	0	2	2	14	1	1	0	0	0	0	0	0	0
73	0	1	3	4	4	28	11	57.1429	2	0	3	25	11	78.5714	0.333333	1	1	0	1	0	1	1	0	4	7	11	100	0	0	25	14	39	100	0.833333	1	1	0	3	3	9	3	1	0	0	0	0	0	0	0
74	0	1	3	4	3	28	10	50	2	3	6	20	5	45.4545	1.33333	2	2	1	0	0	1	1	0	4	6	10	100	0	0	20	11	31	100	1.5	2	2	0	3	6	14	3	1	2	2	0	0	2	2	2
75	0	1	4	8	0	24	12	0	2	0	10	40	0	0	1.66667	2	2	1	0	1	3	1	0	8	4	12	100	0	0	35	10	45	100	1	1	1	0	4	10	14	3	1	3	0	0	3	0	0	0
76	0	1	5	8	5	24	18	50	2	6	11	40	14	56	0.833333	1	1	0	0	0	2	1	2	8	8	18	80	1	4	40	21	65	84	0.166667	1	1	0	3	7	9	4	1	2	1	1	1	1	1	2
77	1	1	4	0	10	32	14	71.4286	2	0	7	0	17	70.8333	0.833333	1	2	1	1	0	1	1	0	0	14	14	100	0	0	0	24	24	100	0.5	1	1	0	4	7	14	3	1	2	5	0	0	1	0	1
78	0	1	2	2	0	30	4	0	1	1	3	10	0	0	0.833333	1	2	1	0	0	1	1	0	2	2	4	100	0	0	10	3	13	100	0.666667	1	1	0	2	3	14	1	1	2	0	0	0	2	0	2
79	0	1	3	0	0	32	3	0	1	0	6	0	0	0	0	0	0	0	0	0	1	1	0	0	3	3	100	0	0	0	5	5	100	0	0	0	0	3	5	14	1	1	2	3	2	0	1	1	2
8	0	1	1	0	4	32	5	80	1	0	2	0	5	71.4286	0	0	0	0	0	0	1	1	0	0	5	5	100	0	0	0	7	7	100	0	0	0	0	1	2	14	1	1	2	0	0	0	0	0	0
80	0	1	5	0	2	32	7	28.5714	1	0	10	0	2	16.6667	0.833333	1	2	1	0	0	1	1	1	0	6	7	85.7143	1	3	0	9	12	75	0.666667	2	1	0	4	7	14	2	1	1	0	0	0	1	0	1
81	0	1	1	3	5	29	9	83.3333	2	0	1	15	13	92.8571	0.333333	1	1	0	0	0	1	1	0	3	6	9	100	0	0	15	14	29	100	0	0	1	0	1	1	14	3	1	1	0	1	0	1	0	1
82	0	1	3	4	3	28	10	50	2	0	6	20	7	53.8462	0.166667	1	1	0	1	1	1	1	0	4	6	10	100	0	0	20	13	33	100	0.666667	1	1	0	3	6	7	3	1	1	0	0	0	0	0	1
83	1	1	2	3	1	29	6	33.3333	1	0	2	15	1	33.3333	1	2	2	1	1	0	1	1	0	3	3	6	100	0	0	15	3	18	100	0.5	1	0	0	2	2	14	1	1	4	4	4	3	4	4	4
84	0	1	2	2	11	30	15	84.6154	2	0	3	10	22	88	1	2	1	0	0	0	2	1	1	2	12	15	92.3077	1	1	10	24	35	96	0.166667	1	1	0	1	2	14	4	1	2	4	3	4	2	2	3
85	0	1	1	2	8	30	11	88.8889	2	0	2	10	11	84.6154	1	1	2	1	0	0	3	1	0	2	9	11	100	0	0	10	13	23	100	0.333333	1	1	0	1	2	24	3	1	0	0	0	0	0	0	0
86	0	1	5	4	0	28	9	0	2	0	8	20	0	0	0	0	0	0	0	0	1	1	0	4	5	9	100	0	0	20	8	28	100	0	0	0	0	5	8	7	3	1	4	4	2	0	3	0	2
87	0	1	4	2	7	30	13	63.6364	2	0	8	10	26	76.4706	1	1	2	1	0	0	3	1	2	2	9	13	81.8182	1	2	10	31	43	93.9394	1.5	2	2	0	2	5	14	4	1	0	0	0	0	0	0	0
88	0	1	9	2	8	30	19	47.0588	2	0	11	20	16	59.2593	0	0	0	0	0	0	1	1	3	2	15	20	83.3333	1	5	15	29	49	85.2941	1.33333	2	1	0	6	6	22	4	1	1	0	0	0	1	0	1
89	0	1	5	0	7	32	12	58.3333	2	0	9	5	30	76.9231	1	1	2	1	0	0	1	1	0	0	12	12	100	0	0	0	44	44	100	0	0	0	0	5	9	14	3	1	0	2	2	2	1	1	1
9	0	1	2	6	9	26	17	81.8182	2	0	5	30	35	87.5	0	0	0	0	0	0	1	1	0	6	11	17	100	0	0	30	38	68	100	0	0	0	0	2	5	49	3	1	0	0	0	0	0	0	1
90	0	1	1	6	4	26	11	80	2	0	1	30	7	87.5	0.666667	1	1	0	0	0	3	1	0	6	5	11	100	0	0	30	8	38	100	0	0	0	0	1	1	14	3	1	0	0	0	0	0	0	2
91	0	1	5	4	4	28	13	44.4444	2	0	11	20	7	38.8889	1	1	1	0	0	0	3	1	1	4	8	13	88.8889	1	2	20	16	38	88.8889	0.833333	2	1	0	4	9	17	4	1	5	5	0	0	2	0	3
92	0	1	10	3	2	29	15	16.6667	2	1	22	15	3	12	1.33333	2	1	0	0	0	1	1	7	3	5	15	41.6667	1	13	15	12	40	48	0.833333	2	1	0	3	9	34	4	1	0	0	0	0	0	0	0
93	0	1	4	1	9	31	14	69.2308	2	0	6	5	14	70	1	1	1	0	0	0	3	1	2	1	11	14	84.6154	1	4	5	17	26	80.9524	0.5	1	1	0	2	2	51	4	1	0	0	0	0	0	0	0
94	0	1	8	0	3	32	11	27.2727	2	0	22	0	3	12	1.16667	2	1	0	1	0	3	1	4	0	7	11	63.6364	1	10	0	15	25	60	1	1	1	0	4	12	14	4	1	0	3	0	0	1	0	2
95	0	1	3	3	7	29	13	70	2	0	2	15	13	86.6667	0	0	0	0	1	0	1	1	2	3	8	13	80	1	2	15	14	31	87.5	1	1	1	0	1	1	35	4	1	0	5	0	0	0	0	0
96	0	1	2	0	4	32	6	66.6667	1	0	6	0	5	45.4545	0.5	1	1	0	1	0	3	1	0	0	6	6	100	0	0	0	11	11	100	0	0	1	0	2	6	38	1	1	0	0	0	0	1	1	1
97	0	1	5	3	3	29	11	37.5	2	0	13	15	3	18.75	0.666667	1	1	0	0	0	2	1	2	3	6	11	75	1	5	15	11	31	68.75	0.333333	1	1	0	3	8	14	4	1	0	0	0	0	0	0	1
98	0	1	1	4	18	28	23	94.7368	2	0	4	20	45	91.8367	1.83333	2	2	1	0	0	1	1	0	4	19	23	100	0	0	19	50	69	100	1.16667	2	1	0	1	3	15	3	1	1	0	0	0	0	0	0
99	0	1	5	0	13	32	18	72.2222	2	0	14	0	26	65	2	2	2	1	1	0	3	1	2	0	16	18	88.8889	1	3	0	35	38	92.1053	1	1	1	0	3	9	8	4	1	3	4	0	0	5	0	0
[truncated: 163 more columns]
